# Supplementary material for: Machine learning derived risk prediction of anorexia nervosa
Source: PubMed Central journal article supplement (PMC4721143; doi:10.1186/s12920-016-0165-x), 2016-01-20

# ROC plot

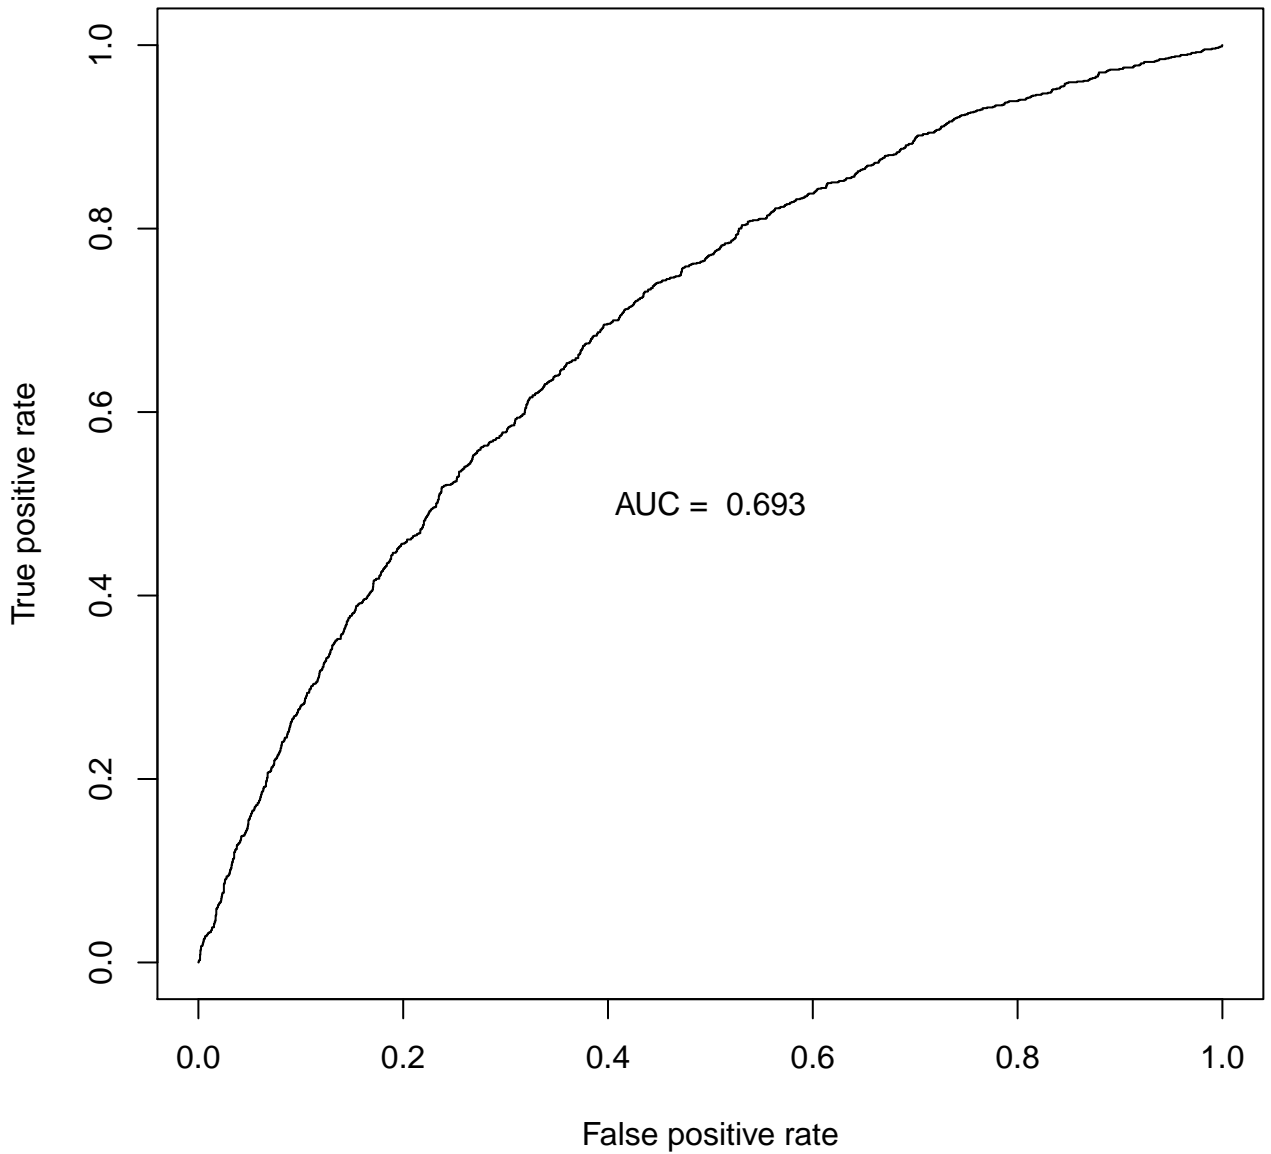

Supplement: 12920_2016_165_MOESM2_ESM.pdf [file 12920_2016_165_MOESM2_ESM.pdf]
